# Supplementary material for: Theoretical uncovering of the chalcogen element regulated ESDPT behaviors for 2,5-bis(2-benzoxazolyl)-hydroquinone derivatives
Source: Royal Society of Chemistry journal article supplement (doi:10.1039/d4ra03443k), 2024-01-01
Supplement: d4ra03443k1.pdf [file d4ra03443k1.pdf]

Supporting information

# Theoretical uncovering the chalcogen elements regulated ESDPT behaviors for 2,5-bis(2-benzoxazolyl)-hydroquinone derivatives

Jiahe Chen, Jinfeng Zhao\*

*College of Physical Science and Technology, Shenyang Normal University, Shenyang 110034,  
China.*

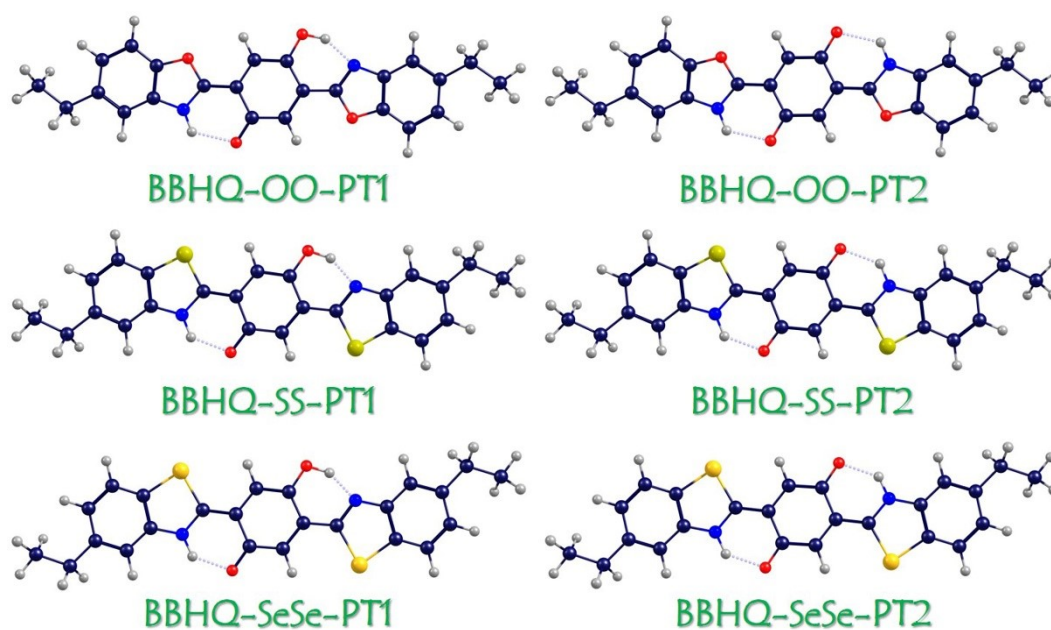

**Figure S1.** View of the optimized single proton-transfer BBHQ-OO-PT1, BBHQ-SS-PT1 and BBHQ SeSe-PT1 as well as the dual proton-transfer BBHQ-OO-PT2, BBHQ-SS-PT2 and BBHQ-SeSe-PT2 forms.

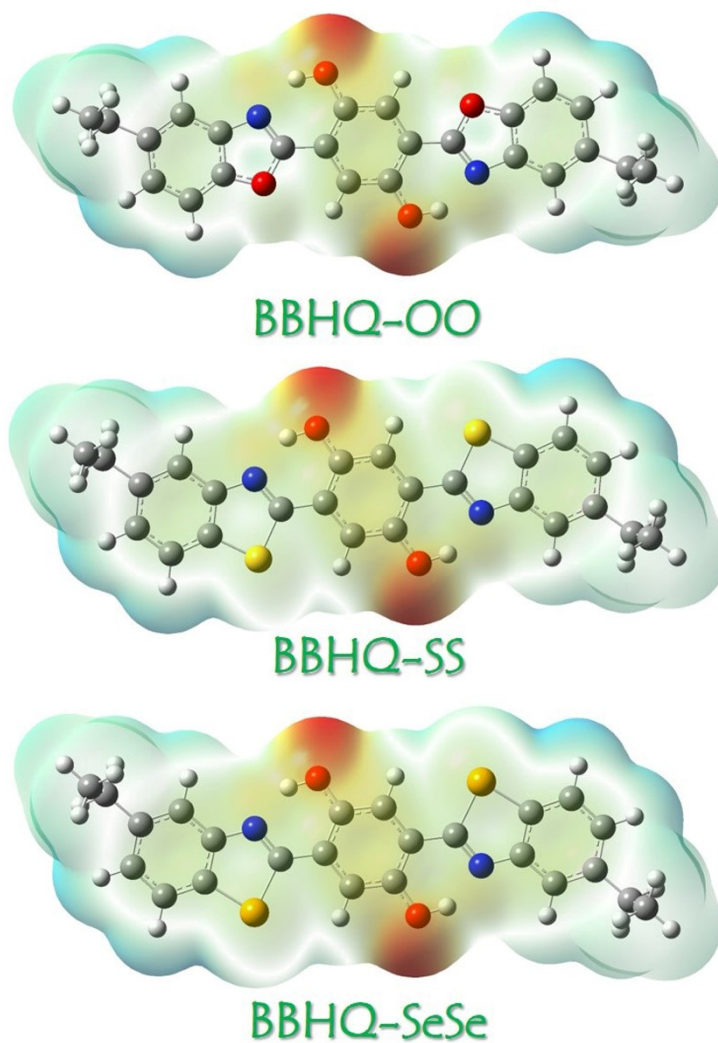

**Figure S2.** The MEP maps for BBHQ-OO, BBHQ-SS and BBHQ-SeSe fluorophores.

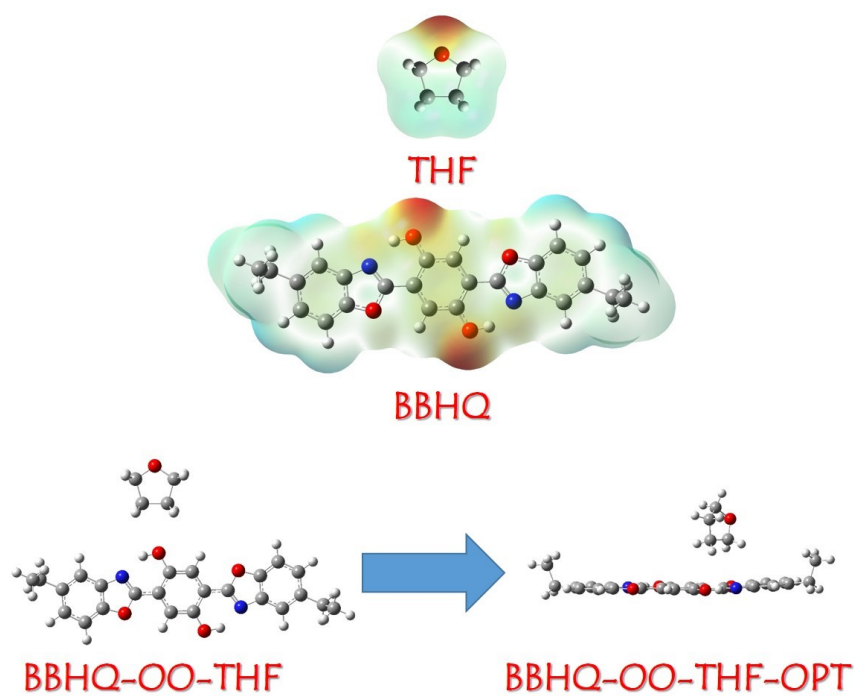

**Figure S3.** The MEP maps for THF and BBHQ-OO. The initial constructed structure BBHQ-OO-THF and its optimized BBHQ-OO-THF-OPT is also shown.

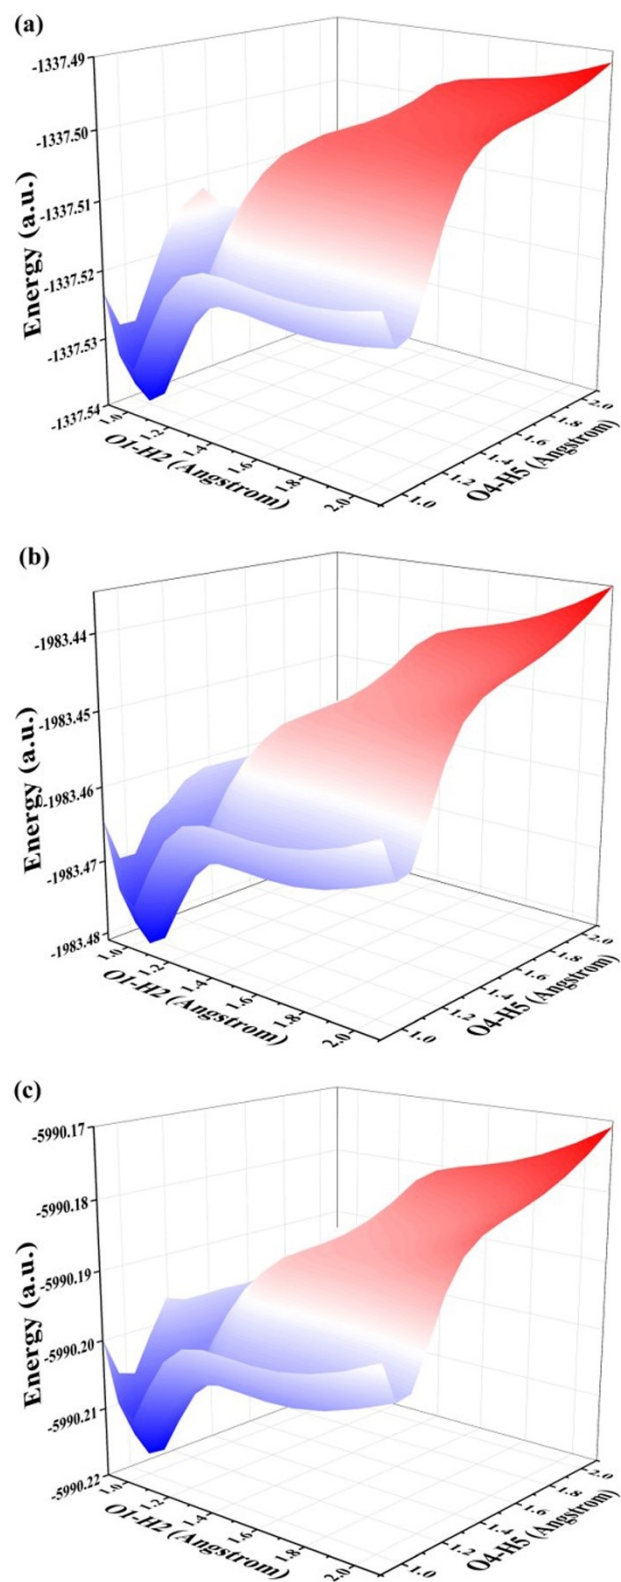

**Figure S4.** The constructed  $S_0$ -state PESs for (a) BBHQ-OO, (b) BBHQ-SS and (c) BBHQ-SeSe.

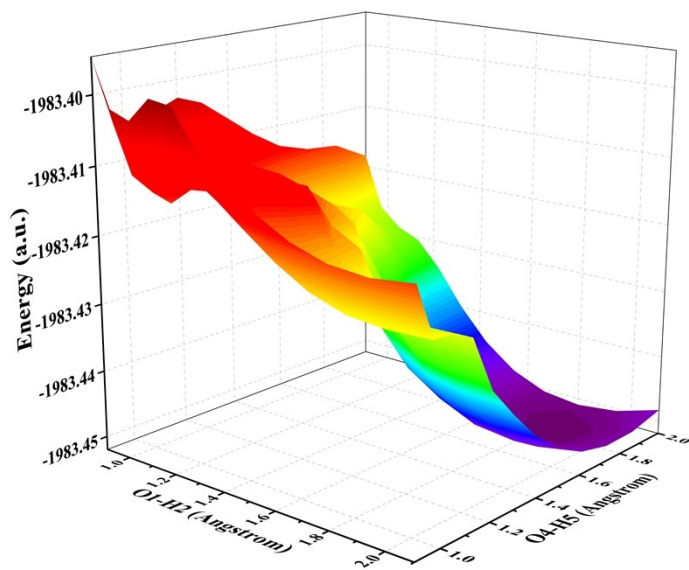

**Figure S5.** The constructed T<sub>1</sub>-state PES BBHQ-SS fluorophore.

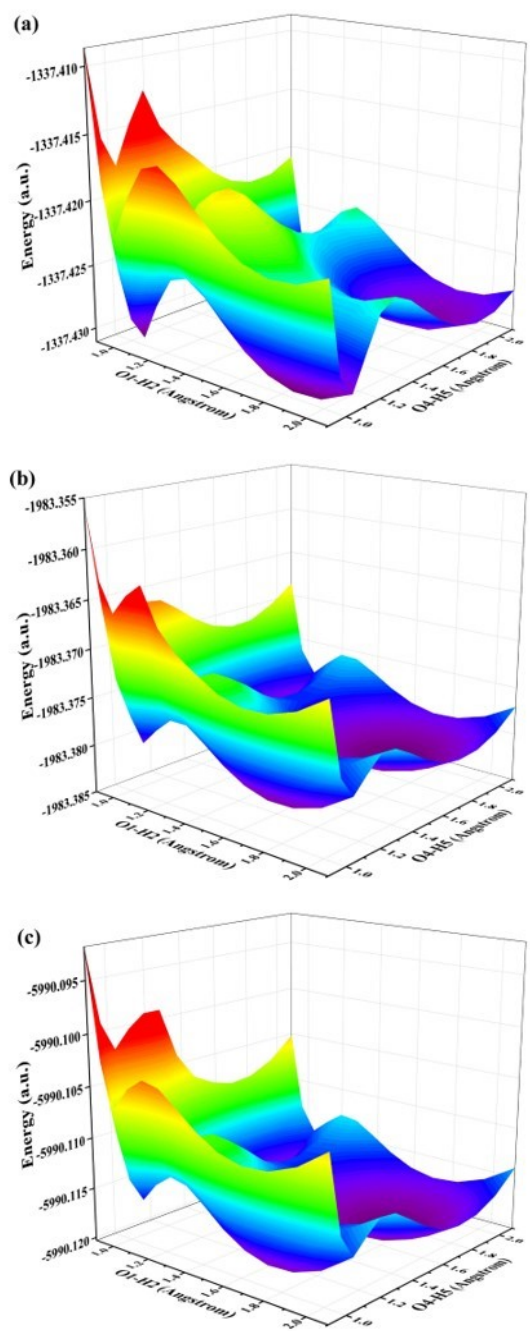

**Figure S6.** The constructed gas-state PES for BBHQ-OO (a), BBHQ-SS (b) and BBHQ-SeSe (c).

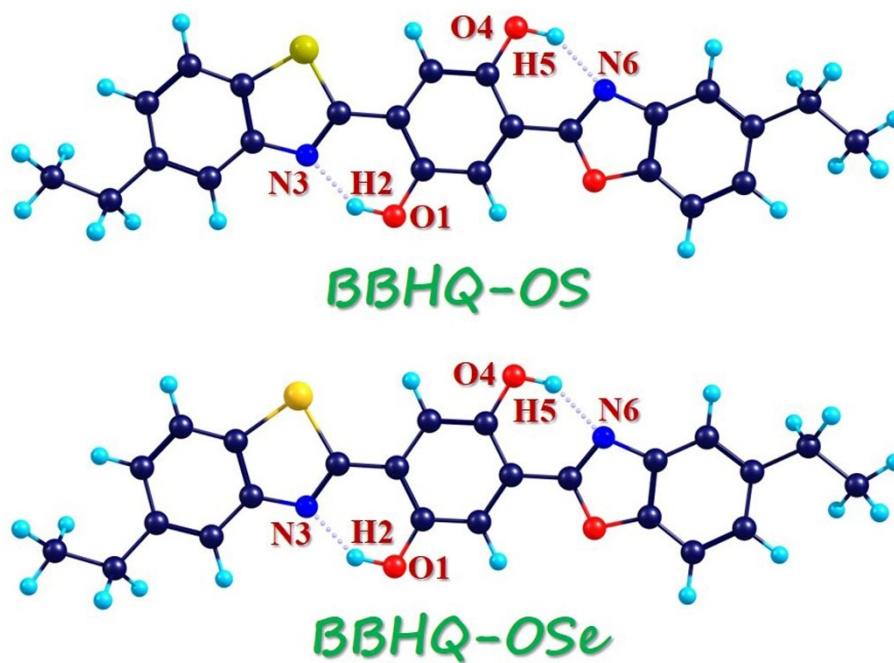

**Figure S7.** Structures of heterosubstituted oxygen–sulphur BBHQ-OS and oxygen-selenium BBHQ-OSe compounds.

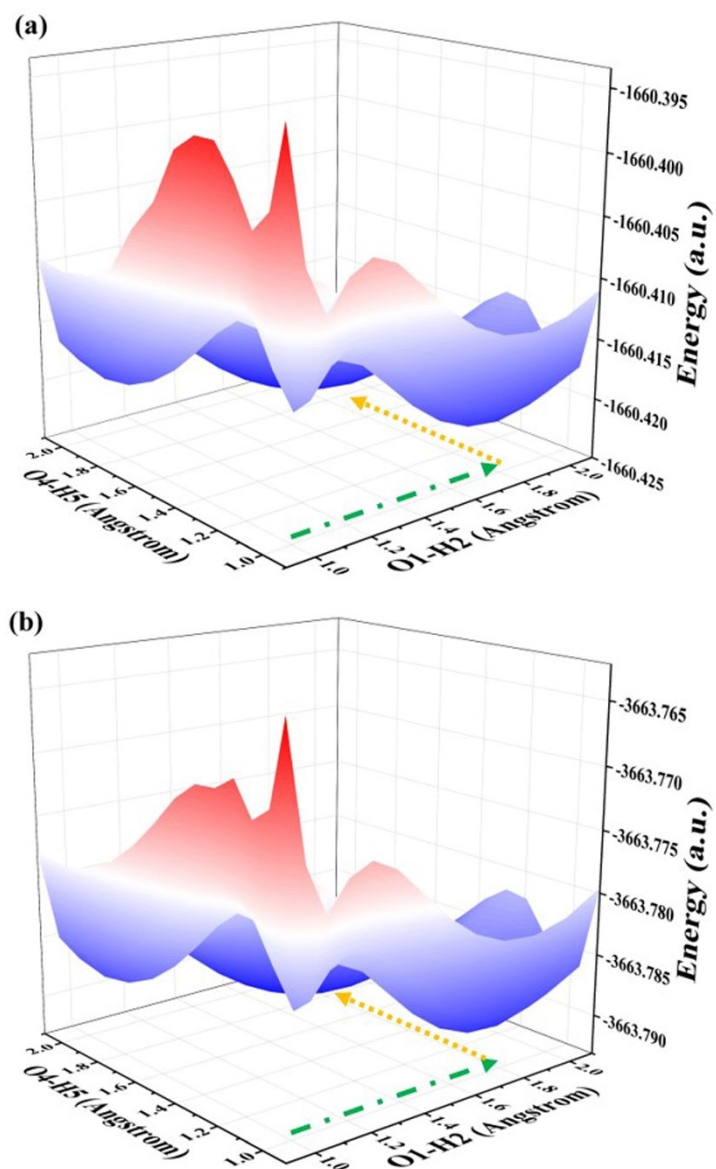

**Figure S8.** View of the constructed S<sub>1</sub>-state PESs for BBHQ-OS (a) and BBHQ-OSe (b). Herein, to more clearly present the effect of heterosubstituted oxygen-sulphur and oxygen-selenium, we change the angle of the entire PESs.



**Table S1.** Parameters of bond lengths (Å) and bond angles ( $\Delta^\circ$ ) involved in O1 $\cdots$ H2-N3 and O4-H5 $\cdots$ N6 for BBHQ-OO-PT1, BBHQ-SS-PT1 and BBHQ-SeSe-PT1 in  $S_0$  and  $S_1$  states.

|                   | BBHQ-OO-PT1 |        | BBHQ-SS-PT1 |        | BBHQ-SeSe-PT1 |        |
|-------------------|-------------|--------|-------------|--------|---------------|--------|
|                   | $S_0$       | $S_1$  | $S_0$       | $S_1$  | $S_0$         | $S_1$  |
| O1 $\cdots$ H2    | 1.7382      | 1.9620 | 1.5913      | 1.8707 | 1.5832        | 1.7946 |
| H2-N3             | 1.0403      | 1.0203 | 1.0636      | 1.0211 | 1.0654        | 1.0317 |
| O4-H5             | 0.9838      | 1.0093 | 0.9879      | 1.0153 | 0.9885        | 1.0234 |
| H5 $\cdots$ N6    | 1.7990      | 1.6812 | 1.7469      | 1.6567 | 1.7432        | 1.6085 |
| $\Delta$ (O1H2N3) | 132.84      | 124.35 | 141.16      | 130.30 | 142.13        | 134.38 |
| $\Delta$ (O4H5N6) | 146.03      | 148.60 | 146.72      | 148.27 | 146.78        | 149.99 |

**Table S2.** Parameters of bond lengths (Å) and bond angles ( $\Delta^\circ$ ) involved in O1 $\cdots$ H2-N3 and O4 $\cdots$ H5-N6 for BBHQ-OO-PT2, BBHQ-SS-PT2 and BBHQ-SeSe-PT2 in  $S_0$  and  $S_1$  states.

|                   | BBHQ-OO-PT2 |        | BBHQ-SS-PT2 |        | BBHQ-SeSe-PT2 |        |
|-------------------|-------------|--------|-------------|--------|---------------|--------|
|                   | $S_0$       | $S_1$  | $S_0$       | $S_1$  | $S_0$         | $S_1$  |
| O1 $\cdots$ H2    | 0.9867      | 1.9420 | 0.9910      | 1.8070 | 0.9917        | 1.7883 |
| H2-N3             | 1.7930      | 1.0204 | 1.7392      | 1.0296 | 1.7345        | 1.0316 |
| O4 $\cdots$ H5    | 0.9867      | 1.9420 | 0.9910      | 1.8070 | 0.9917        | 1.7883 |
| H5-N6             | 1.7930      | 1.0204 | 1.7392      | 1.0296 | 1.7345        | 1.0316 |
| $\Delta$ (O1H2N3) | 145.68      | 125.12 | 146.50      | 133.14 | 146.59        | 134.66 |
| $\Delta$ (O4H5N6) | 145.68      | 125.12 | 146.50      | 133.14 | 146.59        | 134.66 |

**Table S3.** Parameters of bond lengths (Å) and bond angles ( $\Delta^\circ$ ) involved in O1-H2 $\cdots$ N3 and O4-H5 $\cdots$ N6 for BBHQ-OO-THF-OPT complex in both  $S_0$  and  $S_1$  states.

|                   | BBHQ-OO-THF-OPT |       |
|-------------------|-----------------|-------|
|                   | $S_0$           | $S_1$ |
| O1-H2             | 0.987           | 1.007 |
| H2 $\cdots$ N3    | 1.793           | 1.699 |
| O4-H5             | 0.987           | 1.007 |
| H5 $\cdots$ N6    | 1.793           | 1.699 |
| $\Delta$ (O1H2N3) | 145.7           | 148.4 |
| $\Delta$ (O4H5N6) | 145.7           | 148.4 |

**Table S4.** The Mulliken's charge and NPA charge of O1, H2, N3, O4, H5 and N6 atoms for BBHQ-OO, BBHQ-SS and BBHQ-SeSe compounds in both  $S_0$  and  $S_1$  states.

|           | atoms | Mulliken's charge |        | NPA charge |        |
|-----------|-------|-------------------|--------|------------|--------|
|           |       | $S_0$             | $S_1$  | $S_0$      | $S_1$  |
| BBHQ-OO   | O1    | -0.294            | -0.286 | -0.661     | -0.659 |
|           | H2    | 0.300             | 0.300  | 0.506      | 0.504  |
|           | N3    | -0.154            | -0.157 | -0.496     | -0.498 |
|           | O4    | -0.294            | -0.286 | -0.661     | -0.659 |
|           | H5    | 0.300             | 0.300  | 0.506      | 0.504  |
|           | N6    | -0.154            | -0.157 | -0.496     | -0.498 |
| BBHQ-SS   | O1    | -0.298            | -0.292 | -0.665     | -0.663 |
|           | H2    | 0.308             | 0.308  | 0.503      | 0.499  |
|           | N3    | -0.117            | -0.128 | -0.475     | -0.480 |
|           | O4    | -0.298            | -0.292 | -0.665     | -0.663 |
|           | H5    | 0.308             | 0.308  | 0.503      | 0.499  |
|           | N6    | -0.117            | -0.128 | -0.475     | -0.480 |
| BBHQ-SeSe | O1    | -0.298            | -0.292 | -0.665     | -0.663 |
|           | H2    | 0.310             | 0.310  | 0.502      | 0.498  |
|           | N3    | -0.127            | -0.138 | -0.482     | -0.489 |
|           | O4    | -0.298            | -0.292 | -0.665     | -0.663 |
|           | H5    | 0.310             | 0.310  | 0.502      | 0.498  |
|           | N6    | -0.127            | -0.138 | -0.482     | -0.489 |

## The coordinates of the searched TS forms in S<sub>1</sub> state

BBHQ-OO (TS1 along with I → II path):

|   | X           | Y           | Z           |
|---|-------------|-------------|-------------|
| C | -4.90114300 | -0.27186500 | 0.21607900  |
| C | -4.86512100 | 1.12796300  | 0.10218300  |
| C | -5.99552600 | 1.91154100  | 0.08983600  |
| C | -7.21260200 | 1.23228600  | 0.19973200  |
| C | -7.28845800 | -0.16786900 | 0.31547000  |
| C | -6.12155400 | -0.93548200 | 0.32457300  |
| C | -2.81851800 | 0.37487300  | 0.07112600  |
| H | -5.94409500 | 2.98816600  | 0.00490700  |
| H | -8.13119800 | 1.80623000  | 0.19721200  |
| H | -6.15986300 | -2.01344300 | 0.41423300  |
| C | 0.81736400  | 1.24866700  | -0.13763800 |
| C | 1.41902500  | -0.06865200 | -0.06825200 |
| C | 0.57198700  | -1.17340600 | 0.06654600  |
| C | -0.82482900 | -1.03406900 | 0.11714200  |
| C | -1.41285600 | 0.30799200  | 0.04516200  |
| C | -0.57037800 | 1.40920900  | -0.08898000 |
| H | 0.98264300  | -2.17136700 | 0.12890700  |
| H | -0.97205000 | 2.41124600  | -0.15277600 |
| C | 4.93982700  | 0.26843300  | -0.21982600 |
| C | 4.79084500  | -1.12232300 | -0.09328500 |
| C | 5.85191600  | -1.99907900 | -0.06446000 |
| C | 7.12257400  | -1.42609700 | -0.16910100 |
| C | 7.31607600  | -0.03755400 | -0.29682000 |
| C | 6.21711900  | 0.82234200  | -0.32271600 |
| C | 2.83060600  | -0.16995700 | -0.09381900 |
| H | 5.71064700  | -3.06718400 | 0.02914700  |
| H | 7.99018800  | -2.07478600 | -0.15381900 |
| H | 6.34666700  | 1.89281800  | -0.42217200 |
| N | -3.59685900 | -0.70719700 | 0.19481300  |
| N | 3.68690300  | 0.83866100  | -0.21870400 |
| O | -1.59877800 | -2.07258400 | 0.23049900  |
| H | -2.76404300 | -1.65720800 | 0.24244000  |
| O | 1.56745500  | 2.33767100  | -0.25562700 |
| H | 2.54004200  | 2.06431200  | -0.27551100 |
| O | -3.54368500 | 1.52877700  | 0.01139400  |
| O | 3.44437500  | -1.40138000 | -0.01357800 |
| C | -8.63852500 | -0.84417600 | 0.37377300  |
| C | -9.19559700 | -1.15699300 | -1.02346100 |
| H | -9.34392900 | -0.20339000 | 0.90880600  |
| H | -8.55743800 | -1.77088800 | 0.94711300  |

|   |              |             |             |
|---|--------------|-------------|-------------|
| H | -10.16995300 | -1.64525100 | -0.95281400 |
| H | -9.31464700  | -0.24225700 | -1.60821000 |
| H | -8.52103400  | -1.81919700 | -1.57055400 |
| C | 8.71929300   | 0.52217800  | -0.35010900 |
| C | 9.29894600   | 0.78420200  | 1.04815200  |
| H | 8.71863500   | 1.45369300  | -0.92164900 |
| H | 9.36975600   | -0.17444200 | -0.88544500 |
| H | 10.31163800  | 1.18807700  | 0.98120400  |
| H | 8.68162300   | 1.50011400  | 1.59530400  |
| H | 9.33833700   | -0.13832800 | 1.63156300  |

BBHQ-OO (TS2 along with II → III path):

|   | X           | Y           | Z           |
|---|-------------|-------------|-------------|
| C | -4.91388900 | -0.27165700 | -0.22114100 |
| C | -4.89621800 | 1.12531900  | -0.09501500 |
| C | -6.03703200 | 1.89303700  | -0.06951700 |
| C | -7.24742400 | 1.19901400  | -0.17127700 |
| C | -7.30436800 | -0.19898100 | -0.29748400 |
| C | -6.12521000 | -0.94996000 | -0.32471900 |
| C | -2.83570200 | 0.40399800  | -0.10578900 |
| H | -5.99891200 | 2.96985300  | 0.02110600  |
| H | -8.17322200 | 1.76109000  | -0.15556800 |
| H | -6.15020700 | -2.02747700 | -0.42541600 |
| C | 0.82148700  | 1.36795300  | 0.12592500  |
| C | 1.40096700  | 0.01950500  | 0.01896100  |
| C | 0.56551200  | -1.09613100 | -0.10324100 |
| C | -0.83341300 | -0.97739200 | -0.13840600 |
| C | -1.42851200 | 0.35322900  | -0.03107800 |
| C | -0.60163100 | 1.46410200  | 0.08744500  |
| H | 0.98284600  | -2.09177300 | -0.17510800 |
| H | -1.02643100 | 2.45711500  | 0.15872500  |
| C | 4.98960100  | 0.27993800  | 0.21866900  |
| C | 4.77785500  | -1.09426200 | 0.09588100  |
| C | 5.80543200  | -2.00823000 | 0.07643300  |
| C | 7.09558400  | -1.48061100 | 0.18370800  |
| C | 7.34000000  | -0.10328400 | 0.30891600  |
| C | 6.27143200  | 0.80023100  | 0.32838400  |
| C | 2.79611600  | -0.12331800 | 0.09308900  |
| H | 5.62303500  | -3.06991900 | -0.01287900 |
| H | 7.93784600  | -2.16132300 | 0.17339600  |
| H | 6.43724300  | 1.86494700  | 0.42735200  |
| N | -3.60055100 | -0.68902100 | -0.22341700 |
| N | 3.72942800  | 0.84620500  | 0.21136100  |
| O | -1.59151000 | -2.03099200 | -0.26138300 |

|   |              |             |             |
|---|--------------|-------------|-------------|
| H | -2.76763100  | -1.62449900 | -0.27011300 |
| O | 1.55773700   | 2.39091200  | 0.24396900  |
| H | 3.41873400   | 1.81602900  | 0.27565500  |
| O | -3.57811900  | 1.54617100  | -0.02332000 |
| O | 3.41561300   | -1.33109100 | 0.01963400  |
| C | -8.64393900  | -0.89738400 | -0.34814100 |
| C | -9.16148500  | -1.27236700 | 1.04876900  |
| H | -8.56116700  | -1.80091400 | -0.95750900 |
| H | -9.37340100  | -0.25065500 | -0.84216300 |
| H | -10.12858800 | -1.77581700 | 0.98363700  |
| H | -8.46222800  | -1.94168200 | 1.55475900  |
| H | -9.28198000  | -0.38217100 | 1.67005200  |
| C | 8.75975100   | 0.40986100  | 0.36794300  |
| C | 9.33406200   | 0.69849300  | -1.02747200 |
| H | 9.39061900   | -0.32470500 | 0.87425400  |
| H | 8.79301000   | 1.32169500  | 0.96926900  |
| H | 10.35917000  | 1.06792600  | -0.95574800 |
| H | 9.33960600   | -0.20573200 | -1.63984700 |
| H | 8.73590300   | 1.45109600  | -1.54572100 |

BBHQ-SS (TS1 along with I → II path):

|   | X           | Y           | Z           |
|---|-------------|-------------|-------------|
| C | -4.97479800 | -0.08817400 | -0.12016900 |
| C | -5.19429100 | 1.30973500  | -0.10673200 |
| C | -6.47997900 | 1.83086700  | -0.10361100 |
| C | -7.55094500 | 0.94329100  | -0.11194300 |
| C | -7.35908400 | -0.45168600 | -0.12477100 |
| C | -6.06804900 | -0.96446700 | -0.12948500 |
| C | -2.81275300 | 0.61000300  | -0.11815600 |
| H | -6.64883300 | 2.89969600  | -0.09850200 |
| H | -8.56043800 | 1.33668200  | -0.11152900 |
| H | -5.89360000 | -2.03336500 | -0.14147300 |
| C | 0.91580400  | 1.13586000  | -0.11183000 |
| C | 1.40719600  | -0.23126400 | -0.12458700 |
| C | 0.45077200  | -1.24784700 | -0.13428200 |
| C | -0.93035600 | -0.98840000 | -0.13171000 |
| C | -1.40830700 | 0.39674300  | -0.11936700 |
| C | -0.45667000 | 1.41106500  | -0.10958700 |
| H | 0.74646800  | -2.28889100 | -0.14367900 |
| H | -0.74890000 | 2.45328400  | -0.10008000 |
| C | 4.99648500  | 0.08241200  | -0.11896700 |
| C | 5.14145700  | -1.32659600 | -0.13250400 |

|   |             |             |             |
|---|-------------|-------------|-------------|
| C | 6.39634300  | -1.91960600 | -0.14142400 |
| C | 7.51620700  | -1.09496000 | -0.13461600 |
| C | 7.40334500  | 0.30886700  | -0.12036700 |
| C | 6.14311300  | 0.89145400  | -0.11302000 |
| C | 2.81447900  | -0.46384500 | -0.12729500 |
| H | 6.50510000  | -2.99624200 | -0.15711100 |
| H | 8.50192500  | -1.54487900 | -0.14374400 |
| H | 6.02897500  | 1.96879600  | -0.10441600 |
| N | -3.65529900 | -0.43359300 | -0.12658900 |
| N | 3.70594300  | 0.52548900  | -0.11669200 |
| O | -1.78443500 | -1.97051600 | -0.14027200 |
| H | -2.87137300 | -1.45999700 | -0.13549400 |
| O | 1.75242700  | 2.16174200  | -0.10183000 |
| H | 2.70475700  | 1.78787400  | -0.10490900 |
| C | -8.55194600 | -1.37686000 | -0.08013800 |
| C | -9.05694800 | -1.60832500 | 1.35232200  |
| H | -8.28702000 | -2.33619300 | -0.53091700 |
| H | -9.36030700 | -0.95644700 | -0.68422700 |
| H | -9.92090100 | -2.27633800 | 1.35620700  |
| H | -8.27601100 | -2.05638900 | 1.97051700  |
| H | -9.35357300 | -0.66593300 | 1.81779700  |
| C | 8.64771800  | 1.16346100  | -0.06186700 |
| C | 9.18927900  | 1.31133100  | 1.36814300  |
| H | 8.43052800  | 2.15280500  | -0.47162600 |
| H | 9.42157900  | 0.72252300  | -0.69617400 |
| H | 10.08944200 | 1.92978800  | 1.38161600  |
| H | 8.44500300  | 1.77736200  | 2.01760400  |
| H | 9.44031200  | 0.33663500  | 1.79224500  |
| S | -3.65048000 | 2.17149600  | -0.10304800 |
| S | 3.55298000  | -2.09163400 | -0.14298600 |

BBHQ-SS (TS2 along with II → III path):

|   | X           | Y           | Z           |
|---|-------------|-------------|-------------|
| C | 4.98239300  | -0.07532700 | -0.19200200 |
| C | 5.21569600  | 1.31300900  | -0.07071700 |
| C | 6.50530400  | 1.82394400  | -0.07649000 |
| C | 7.56800800  | 0.93454400  | -0.20345800 |
| C | 7.36185500  | -0.45149200 | -0.32534400 |
| C | 6.06542100  | -0.95355200 | -0.31960400 |
| C | 2.82603500  | 0.63354200  | -0.04411800 |
| H | 6.68396600  | 2.88770700  | 0.01143800  |
| H | 8.58024700  | 1.32080400  | -0.21161000 |
| H | 5.88091500  | -2.01673900 | -0.41434600 |
| C | -0.92956200 | 1.22497900  | 0.15675000  |

|   |              |             |             |
|---|--------------|-------------|-------------|
| C | -1.39568300  | -0.16961400 | 0.04229100  |
| C | -0.44652500  | -1.18638100 | -0.08699800 |
| C | 0.93608500   | -0.94063300 | -0.11693300 |
| C | 1.41830300   | 0.43341100  | -0.00703100 |
| C | 0.48043100   | 1.44763300  | 0.12338600  |
| H | -0.74623000  | -2.22402400 | -0.17133100 |
| H | 0.79326600   | 2.48149100  | 0.20820300  |
| C | -5.04421500  | 0.06258500  | 0.19543000  |
| C | -5.13339200  | -1.33260100 | 0.05992600  |
| C | -6.36840000  | -1.96420100 | 0.04504100  |
| C | -7.50994600  | -1.17869400 | 0.16545700  |
| C | -7.43867300  | 0.21867400  | 0.30101500  |
| C | -6.19456300  | 0.84250400  | 0.31640700  |
| C | -2.78424200  | -0.44773400 | 0.06701900  |
| H | -6.44418600  | -3.03878800 | -0.05401400 |
| H | -8.48106800  | -1.65861000 | 0.15760500  |
| H | -6.11236400  | 1.91730100  | 0.42177800  |
| N | 3.65790800   | -0.41147800 | -0.17355400 |
| N | -3.74186400  | 0.49873300  | 0.19485200  |
| O | 1.77769000   | -1.92995900 | -0.24110000 |
| H | 2.87388500   | -1.42273800 | -0.23665400 |
| O | -1.74087900  | 2.19016100  | 0.27923100  |
| H | -3.40009600  | 1.46636400  | 0.27604500  |
| C | 8.54541700   | -1.38654000 | -0.40858900 |
| C | 9.10323300   | -1.74751800 | 0.97656100  |
| H | 9.33466300   | -0.92126200 | -1.00510400 |
| H | 8.25270500   | -2.30050900 | -0.93100400 |
| H | 9.95844000   | -2.42110300 | 0.88820200  |
| H | 9.42925700   | -0.85207900 | 1.51016500  |
| H | 8.34149700   | -2.24082900 | 1.58426400  |
| C | -8.70402500  | 1.03911600  | 0.37467800  |
| C | -9.24321700  | 1.40254300  | -1.01745800 |
| H | -8.51344200  | 1.95422400  | 0.94032700  |
| H | -9.46646600  | 0.48097300  | 0.92375600  |
| H | -10.15857200 | 1.99234100  | -0.93610600 |
| H | -8.50944400  | 1.98650800  | -1.57716400 |
| H | -9.46767500  | 0.50332300  | -1.59509900 |
| S | 3.67940200   | 2.18261900  | 0.06764300  |
| S | -3.51881000  | -2.04761400 | -0.06606800 |

BBHQ-SeSe (TS1 along with I → II path):

|   | X           | Y           | Z           |
|---|-------------|-------------|-------------|
| C | -4.97602700 | -0.25376400 | -0.10377900 |
| C | -5.33255500 | 1.11617700  | -0.09350100 |

|   |             |             |             |
|---|-------------|-------------|-------------|
| C | -6.66463200 | 1.50430600  | -0.09198900 |
| C | -7.64677000 | 0.51959300  | -0.09922200 |
| C | -7.31934400 | -0.84949800 | -0.10928800 |
| C | -5.98434000 | -1.22958600 | -0.11205600 |
| C | -2.82074300 | 0.54492500  | -0.10287600 |
| H | -6.93994900 | 2.55106000  | -0.08904300 |
| H | -8.68950200 | 0.81419200  | -0.10024800 |
| H | -5.70592600 | -2.27652200 | -0.12205500 |
| C | 0.89739300  | 1.14511900  | -0.10145200 |
| C | 1.41900200  | -0.21270800 | -0.10829400 |
| C | 0.48232700  | -1.24706200 | -0.11344000 |
| C | -0.90339000 | -1.01707500 | -0.11169200 |
| C | -1.41248100 | 0.35817100  | -0.10427100 |
| C | -0.47991500 | 1.39047400  | -0.09955600 |
| H | 0.79771600  | -2.28258700 | -0.11897300 |
| H | -0.79155300 | 2.42730800  | -0.09438900 |
| C | 5.01166500  | 0.23608900  | -0.10447200 |
| C | 5.29865900  | -1.15195100 | -0.10743000 |
| C | 6.60875400  | -1.61022800 | -0.11044400 |
| C | 7.64308500  | -0.68037700 | -0.10887800 |
| C | 7.38944700  | 0.70418500  | -0.10571500 |
| C | 6.07631400  | 1.15285900  | -0.10399100 |
| C | 2.83056300  | -0.41663300 | -0.10923400 |
| H | 6.82878500  | -2.67001700 | -0.11763700 |
| H | 8.66849500  | -1.03104000 | -0.11339700 |
| H | 5.85355100  | 2.21332700  | -0.10370800 |
| N | -3.63701800 | -0.51517800 | -0.10884800 |
| N | 3.69401000  | 0.59160200  | -0.10580000 |
| O | -1.73610400 | -2.01769200 | -0.11658700 |
| H | -2.82574400 | -1.52801600 | -0.11406500 |
| O | 1.71264700  | 2.18758800  | -0.09667400 |
| H | 2.67259200  | 1.82865700  | -0.09912200 |
| C | -8.41475700 | -1.88813200 | -0.06547500 |
| C | -8.91074000 | -2.15321900 | 1.36424700  |
| H | -8.05083000 | -2.82106100 | -0.50232300 |
| H | -9.25395600 | -1.55645600 | -0.68273100 |
| H | -9.70419000 | -2.90363500 | 1.36715900  |
| H | -8.09636200 | -2.51488800 | 1.99573900  |
| H | -9.30472700 | -1.24009200 | 1.81562500  |
| C | 8.53876800  | 1.68295200  | -0.05226600 |
| C | 9.04587100  | 1.91163700  | 1.37972100  |
| H | 8.22582600  | 2.63720400  | -0.48286100 |
| H | 9.36080900  | 1.31237700  | -0.67073300 |
| H | 9.87827900  | 2.61872600  | 1.38991200  |



|    |             |             |             |
|----|-------------|-------------|-------------|
| H  | 8.25053800  | 2.31137800  | 2.01263600  |
| H  | 9.38957200  | 0.97555200  | 1.82525900  |
| Se | -3.77159800 | 2.20763700  | -0.09049300 |
| Se | 3.68243200  | -2.15167100 | -0.11345700 |

BBHQ-SeSe (TS2 along with II → III path):

|   | X           | Y           | Z           |
|---|-------------|-------------|-------------|
| C | 4.98328800  | -0.24199100 | 0.19075600  |
| C | 5.35369200  | 1.11731400  | 0.07548600  |
| C | 6.68896200  | 1.49327900  | 0.07924100  |
| C | 7.66210800  | 0.50555400  | 0.19709000  |
| C | 7.32025300  | -0.85337900 | 0.31275300  |
| C | 5.98040200  | -1.22064200 | 0.30944200  |
| C | 2.83415200  | 0.57007800  | 0.06093400  |
| H | 6.97460000  | 2.53403400  | -0.00427900 |
| H | 8.70720500  | 0.79164800  | 0.20301400  |
| H | 5.69139500  | -2.26099900 | 0.39965200  |
| C | -0.91176000 | 1.23810800  | -0.11152500 |
| C | -1.40927100 | -0.14857400 | -0.01051000 |
| C | -0.47828600 | -1.18279600 | 0.11253600  |
| C | 0.90851800  | -0.96681800 | 0.13866300  |
| C | 1.42211000  | 0.39764700  | 0.03432400  |
| C | 0.50296700  | 1.42979300  | -0.08255000 |
| H | -0.79687400 | -2.21551000 | 0.19261900  |
| H | 0.83440600  | 2.45858700  | -0.16022300 |
| C | -5.06136900 | 0.21835900  | -0.18763600 |
| C | -5.29323500 | -1.16331600 | -0.08605400 |
| C | -6.58706400 | -1.66395100 | -0.10572800 |
| C | -7.64489100 | -0.76928200 | -0.22595100 |
| C | -7.43196600 | 0.61615800  | -0.32830900 |
| C | -6.13161900 | 1.10857000  | -0.30902200 |
| C | -2.80178600 | -0.40165900 | -0.04401800 |
| H | -6.77393500 | -2.72741500 | -0.03410000 |
| H | -8.65853300 | -1.15118900 | -0.24456300 |
| H | -5.94062000 | 2.17194000  | -0.38874100 |
| N | 3.63955900  | -0.49230900 | 0.17982800  |
| N | -3.73253300 | 0.56974400  | -0.16066200 |
| O | 1.72877200  | -1.97515800 | 0.25416800  |
| H | 2.82611400  | -1.49061400 | 0.24440900  |
| O | -1.70085400 | 2.22262100  | -0.22074600 |
| H | -3.35308400 | 1.52667300  | -0.22428500 |
| C | 8.40385500  | -1.90327200 | 0.38653300  |
| C | 8.91085100  | -2.31829400 | -1.00295700 |
| H | 8.02464100  | -2.78321700 | 0.91180300  |

|    |              |             |             |
|----|--------------|-------------|-------------|
| H  | 9.24096300   | -1.52033500 | 0.97633500  |
| H  | 9.69550400   | -3.07368900 | -0.92149700 |
| H  | 8.09841500   | -2.73339600 | -1.60340500 |
| H  | 9.31954200   | -1.45982500 | -1.54042700 |
| C  | -8.60715500  | 1.56096300  | -0.40574300 |
| C  | -9.15312700  | 1.92573600  | 0.98329900  |
| H  | -9.40271900  | 1.10135100  | -0.99770000 |
| H  | -8.30952100  | 2.47223800  | -0.92976500 |
| H  | -10.00319300 | 2.60592400  | 0.89879800  |
| H  | -9.48336100  | 1.03295800  | 1.51859800  |
| H  | -8.38429500  | 2.41349900  | 1.58636900  |
| Se | 3.80155700   | 2.21829500  | -0.06394100 |
| Se | -3.64382000  | -2.10947000 | 0.05892700  |
